# Supplementary material for: Patient Acceptability of Tear Collection in the Primary Healthcare Setting
Source: PubMed Central journal article supplement — Optom Vis Sci. 2014 Mar 27;91(4):452–8. doi: 10.1097/OPX.0000000000000188 (PMC4189593; doi:10.1097/opx.0000000000000188), 2014-03-27
Supplement: opx-91-452-s001.pdf [file opx-91-452-s001.pdf]

# APPENDIX

## Questionnaire

### I) DEMOGRAPHICS

- 1 Serial number
- 2 Age (in years)
- 3 Gender
- 4 Race
- 5 Highest education level attained

---

|                          |           |                          |           |                          |              |                          |        |
|--------------------------|-----------|--------------------------|-----------|--------------------------|--------------|--------------------------|--------|
| <input type="checkbox"/> | Male      | <input type="checkbox"/> | Female    | <input type="checkbox"/> | Indian       | <input type="checkbox"/> | Others |
| <input type="checkbox"/> | Chinese   | <input type="checkbox"/> | Malay     | <input type="checkbox"/> | Sec(O/N/ITE) | <input type="checkbox"/> | >Sec   |
| <input type="checkbox"/> | No formal | <input type="checkbox"/> | Pri(PSLE) |                          |              |                          |        |

### II) BACKGROUND MEDICAL HISTORY

- 1 Diabetes mellitus
- 2 High Blood Pressure
- 3 High Cholesterol
- 4 Heart diseases
- 5 Stroke
- 6 Asthma or Chronic obstructive lung disease
- 7 Arthritis or Joint problems
- 8 Other medical history, please state

|                          |     |                          |    |                          |           |
|--------------------------|-----|--------------------------|----|--------------------------|-----------|
| <input type="checkbox"/> | yes | <input type="checkbox"/> | no | <input type="checkbox"/> | uncertain |
| <input type="checkbox"/> | yes | <input type="checkbox"/> | no | <input type="checkbox"/> | uncertain |
| <input type="checkbox"/> | yes | <input type="checkbox"/> | no | <input type="checkbox"/> | uncertain |
| <input type="checkbox"/> | yes | <input type="checkbox"/> | no | <input type="checkbox"/> | uncertain |
| <input type="checkbox"/> | yes | <input type="checkbox"/> | no | <input type="checkbox"/> | uncertain |
| <input type="checkbox"/> | yes | <input type="checkbox"/> | no | <input type="checkbox"/> | uncertain |
| <input type="checkbox"/> | yes | <input type="checkbox"/> | no | <input type="checkbox"/> | uncertain |

### III) EYE MEDICAL HISTORY

- 1 Known History of:
  - i) Cataract
  - ii) Glaucoma
  - iii) Dry Eye
  - iv) Other Eye problems
- 2 Do you wear glasses (reading or far)?
- 3 Do you wear contact lens?
- 4 Do you feel anxiety about your eyes?
- 5 Do you currently have eye symptoms?
  - i) If yes, what symptoms?
- 6 Did you have any eye symptoms in the past?
  - i) If yes, what symptoms?
- 7 Have you had an eye check previously?
  - i) If yes:
  - ii) If yes:

|                          |                |                          |           |                          |           |
|--------------------------|----------------|--------------------------|-----------|--------------------------|-----------|
| <input type="checkbox"/> | yes            | <input type="checkbox"/> | no        | <input type="checkbox"/> | uncertain |
| <input type="checkbox"/> | yes            | <input type="checkbox"/> | no        | <input type="checkbox"/> | uncertain |
| <input type="checkbox"/> | yes            | <input type="checkbox"/> | no        | <input type="checkbox"/> | uncertain |
| <input type="checkbox"/> | yes            | <input type="checkbox"/> | no        | <input type="checkbox"/> | uncertain |
| <input type="checkbox"/> | yes            | <input type="checkbox"/> | no        | <input type="checkbox"/> | uncertain |
| <input type="checkbox"/> | yes            | <input type="checkbox"/> | no        | <input type="checkbox"/> | uncertain |
| <input type="checkbox"/> | yes            | <input type="checkbox"/> | no        | <input type="checkbox"/> | uncertain |
| <input type="checkbox"/> | <1 month       | <input type="checkbox"/> | <2 year   | <input type="checkbox"/> | >2 years  |
| <input type="checkbox"/> | Eye specialist | <input type="checkbox"/> | Other doc | <input type="checkbox"/> | Optician  |

**IV) Pain Score**

1 Pain score of today's Tear collection Pain score (0- no pain to 10- worst pain in whole life)

2 Done these laboratory tests before? If yes, what was the pain score? (0- no pain to 10- worst pain in whole life)

|                            |                              |                             |                                    |                               |
|----------------------------|------------------------------|-----------------------------|------------------------------------|-------------------------------|
| i) Venous blood test       | <input type="checkbox"/> yes | <input type="checkbox"/> no | <input type="checkbox"/> uncertain | <input type="checkbox"/> 1-10 |
| ii) Fingerprick blood test | <input type="checkbox"/> yes | <input type="checkbox"/> no | <input type="checkbox"/> uncertain | <input type="checkbox"/> 1-10 |
| iii) Urine test            | <input type="checkbox"/> yes | <input type="checkbox"/> no | <input type="checkbox"/> uncertain | <input type="checkbox"/> 1-10 |
| iv) Stool test             | <input type="checkbox"/> yes | <input type="checkbox"/> no | <input type="checkbox"/> uncertain | <input type="checkbox"/> 1-10 |
| v) X-ray or ultrasound     | <input type="checkbox"/> yes | <input type="checkbox"/> no | <input type="checkbox"/> uncertain | <input type="checkbox"/> 1-10 |

**V) Acceptability of Tear protein collection**

|                                                                                  |                              |                             |                                    |
|----------------------------------------------------------------------------------|------------------------------|-----------------------------|------------------------------------|
| 1 Is Tear collection acceptable for yourself?                                    | <input type="checkbox"/> yes | <input type="checkbox"/> no | <input type="checkbox"/> uncertain |
| 2 Do you mind your tears being collected to screen for eye problems?             | <input type="checkbox"/> yes | <input type="checkbox"/> no | <input type="checkbox"/> uncertain |
| 3 Do you mind your tears being collected if it can detect other health problems? | <input type="checkbox"/> yes | <input type="checkbox"/> no | <input type="checkbox"/> uncertain |
| 4 Would you prefer tear collection to urine collection for health screening?     | <input type="checkbox"/> yes | <input type="checkbox"/> no | <input type="checkbox"/> uncertain |
| 5 Would you prefer tear collection to venous blood testing for health screening? | <input type="checkbox"/> yes | <input type="checkbox"/> no | <input type="checkbox"/> uncertain |
